# Supplementary material
Source: publisher site journal article supplement (https://www.dovepress.com/article/597269)

Appendix Figure 2: Q-Q Plots for Normality Assessment of Outcome Variables by Waiting Room Condition

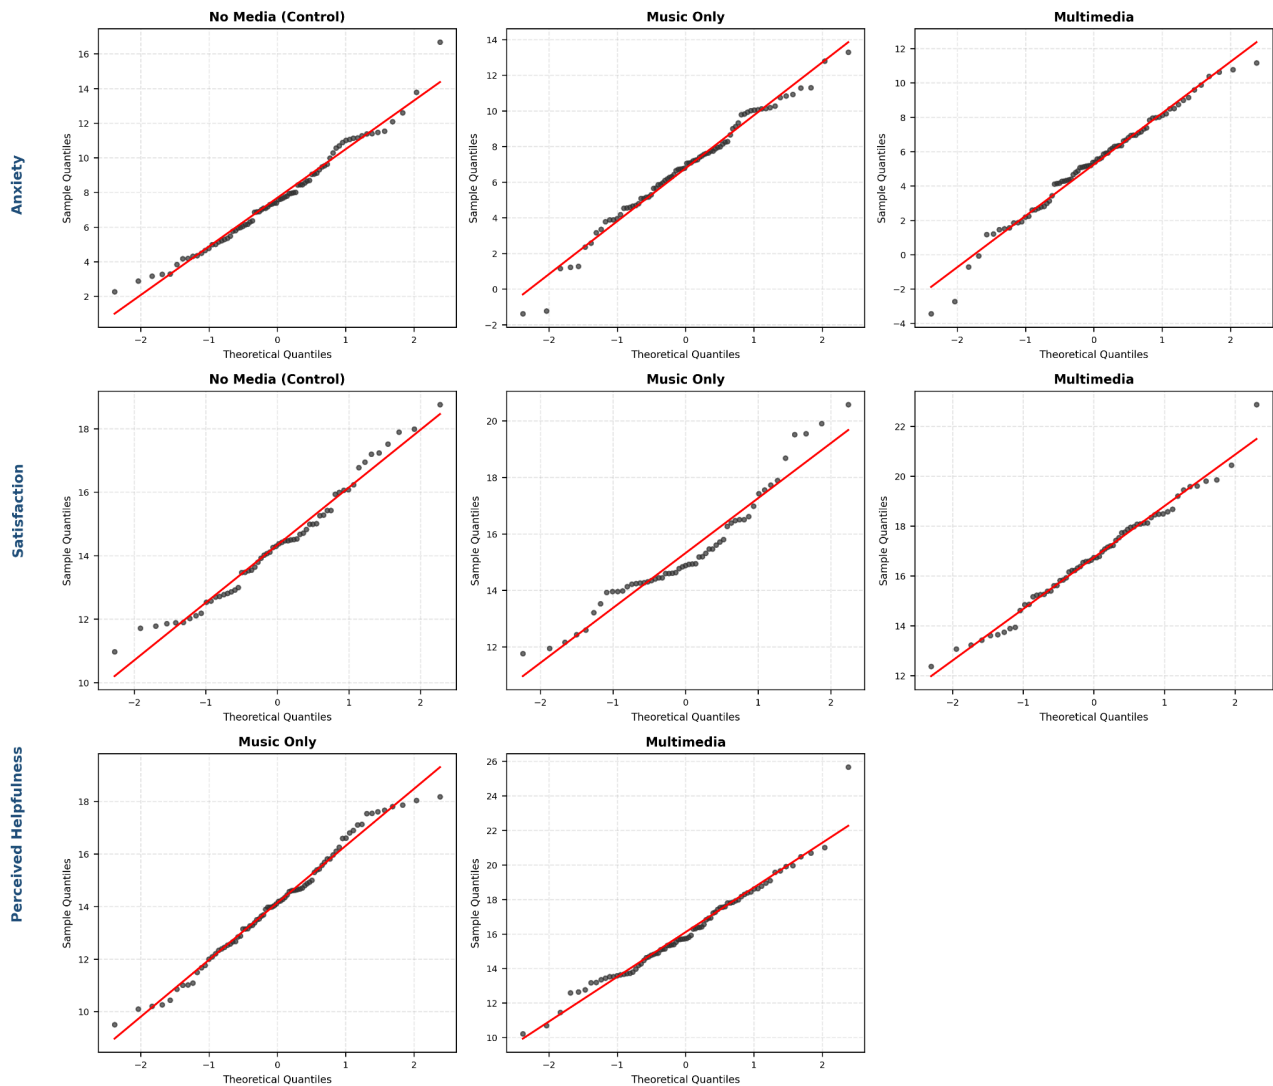

Supplement: Supplementary file 1 [file Appendix Figure 2.pdf › Appendix Figure 2.pdf]
